# Supplementary material for: Preparation of Hierarchical CaSO4 Whisker and Its Reinforcing Effect on PVC Composites
Source: Hindawi journal article supplement (doi:10.1155/2018/7803854), 2018-01-01
Supplement: f1 [file 7803854.f1.docx]

**Supplementary Materials**

The micromechanical model of raw CaSO4 whiskers can be imagined as a single cylindrical whisker surrounded by the PVC matrix. According to the stress balance conditions, the stress equilibrium equation can be calculated as shown in Eq.(1):

(1)

where r is the radius of whisker, τe is the interfacial shearing strength between whisker and resin matrix and σf is the internal stress of whisker under external load along the Z axis.

After integration, Eq.(1) is transformed into Eq.(2):

(2)

When a crack propagates to the whiskers, the crack will grow along the interface between the whisker and the matrix causing de-bonding as a result of the weak interfacial adhesion between the raw CaSO4 whiskers and PVC matrix. It can be assumed that when, Eq.(2) can be written as Eq.(3):

(3)

As the crack propagates through the composite, the whiskers fracture and finally pull out from the PVC matrix as shown in Figure 8(b). The pull-out stress P1 of the fractured whiskers can be expressed by Eq.(4):

(4)

where h was the pull-out displacement of the whiskers.

By integrating Eq. (4), the pull-out stress equation of the smooth whiskers can be expressed as Eqs.(5):

(5)

In this study, the nano CaCO3 particles were considered to be uniformly distributed on the hierarchical whisker surface and the schematic drawing of a separate stress analysis of the CaSO4 hierarchical whiskers is shown in Figure 8(c) and 8(d). The analysis of the pull-out stress of the nano CaCO3 particles on CaSO4 whisker surface yielded Eqs.(6)~(8):

(6)

(7)

(8)

where w is the displacement along the x axis at point M as a result of the stress concentration () at point O, a was the distance between point O and point M, r’ was the horizontal distance between point M and the central axis of the whisker. The parameters and were the Poissons ratio and shear modulus of the resin matrix. It was assumed that the interfacial adhesion between the nano CaCO3 particles and the matrix was well within the range of *θ0*≤*θ*˂, so Eq.(6) can be expressed as Eq.(9):

(9)

On the surface of the nano CaCO3 particles, x and ds can be expressed as Eqs.(10)~(11):

(10)

(11)

Then the left side of Eq.(9) can be expressed as Eq.(12):

(12)

And the right of Eq. (9) can be expressed as Eq.(13):

(13)

Combining Eq. (12) and (13), with Eq. (6) produces Eqs. (14) - (15):

(14)

(15)

Therefore, the pull-out stress equation of the nano CaCO3 particles can be transformed into Eq.(16):

(16)

There were many nano CaCO3 particles on the whisker surface and the pull-out stress of hierarchical whiskers can be expressed as Eq.(17):

(17)

where n was the number of the CaCO3 particles on the surface of whiskers.
